# Supplementary material for: High quantum yield nitrogen and boron co-doped carbon dots for sensing Ag+, biological imaging and fluorescent inks
Source: Royal Society of Chemistry journal article supplement (doi:10.1039/d1ay01582f), 2021-01-01
Supplement: d1ay01582f1.pdf [file d1ay01582f1.pdf]

# High quantum yield nitrogen and boron co-doped carbon dots for sensing of Ag<sup>+</sup>, biological imaging and fluorescent inks

Sijie Cheng <sup>a,1</sup> · Junqiu Zhang <sup>b,1</sup> · Yaoming Liu <sup>a</sup> · Yingte Wang <sup>a</sup> · Yanteng Xiao <sup>a</sup> · Yong Zhang <sup>a,\*</sup>

<sup>a</sup> School of Chemistry and Chemical Engineering, Shanxi University, Taiyuan 030006, Shanxi, China

<sup>b</sup> State Key Laboratory of Food Science and Technology, Jiangnan University; Wuxi, 214122, Jiangsu, China

## 2.1. Apparatus

JEM-2100 transmission electron microscope (JEOL, Japan) was used to obtain the transmission electron microscopy (TEM) of N, B-CDs. X-ray photoelectron spectroscopy (XPS) were obtained from Escalab 250Xi X-ray photoelectron spectroscopy (Thermo Fisher Scientific, USA). X-ray diffraction (XRD) and Fourier transform infrared spectroscopy (FT-IR) were studied by Bruker D8 X-ray diffractometer (Bruker, Germany) and VERTEX 70 Fourier transform infrared spectrometer (Bruker, Germany). Ultraviolet-visible absorption spectrum (UV-vis) and fluorescence spectra were obtained by TU-1901 ultraviolet-visible absorption spectrometer (Purkay, Beijing) and RF-5301 fluorescence spectrometer (Shimadzu, Japan). Fluorescence lifetime decay curve was obtained from FLS920 Steady-state transient fluorescence spectrometer (Photon Technology International (PTI), USA).

---

\* Corresponding author.

E-mail address: zhangyong@sxu.edu.cn (Y. Zhang).

<sup>1</sup> These two authors contributed equally to this work.

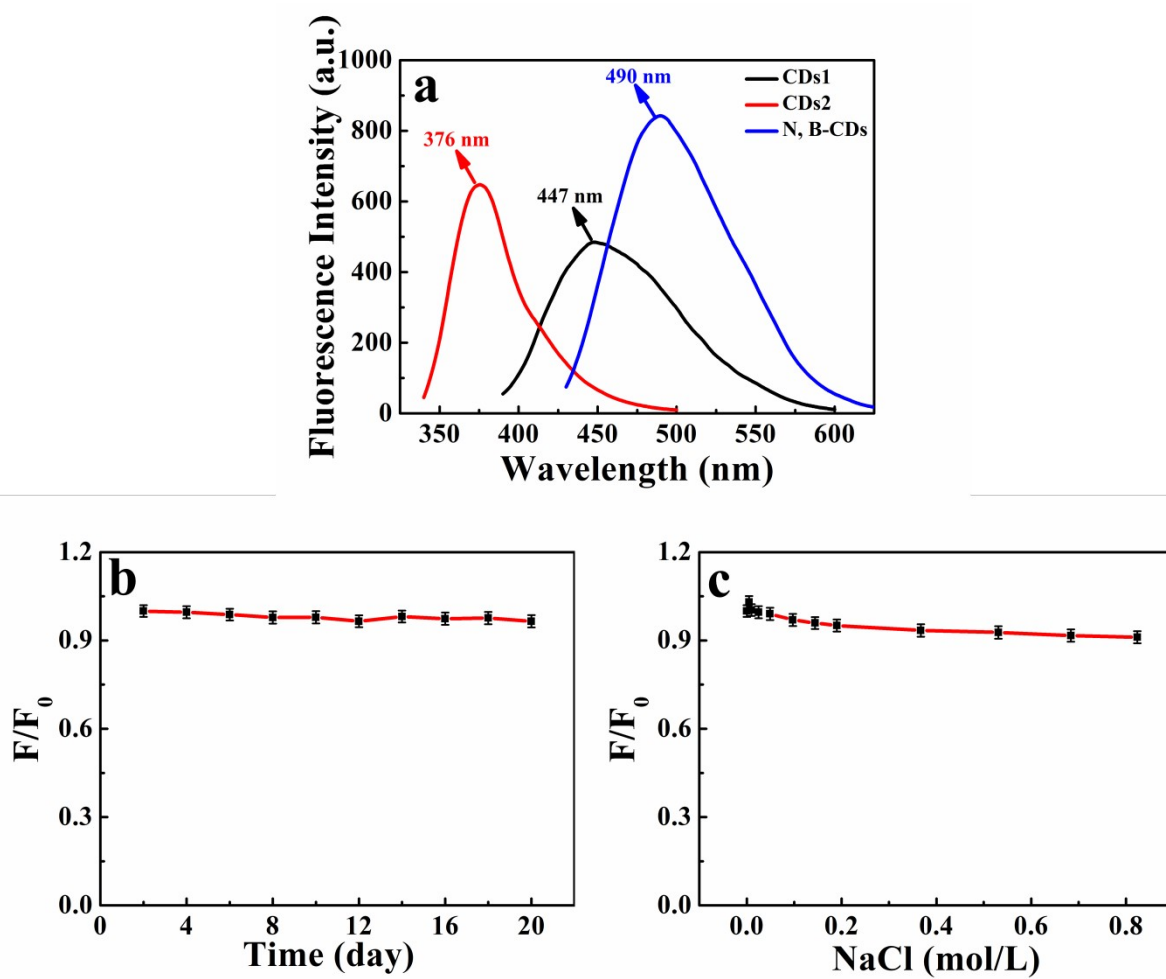

**Fig. S1.** (a) Fluorescence emission spectrum of N, B-CDs, CDs 1 and CDs 2; Effect of (b) storage time and (c) concentration of NaCl on the fluorescence intensity of N, B-CDs.

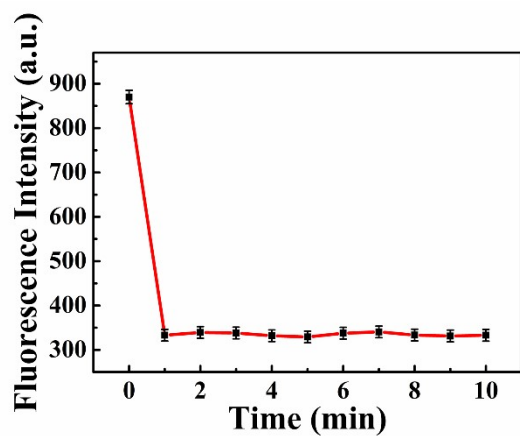

**Fig. S2.** Change of fluorescence intensity of N, B-CDs with time after adding  $\text{Ag}^+$ . ( $\lambda_{\text{ex}} = 430 \text{ nm}$ ,  $\lambda_{\text{em}} = 490 \text{ nm}$ )

**Table S1**

Comparison of optical properties of other B-doped CDs.

| Materials 1               | Materials 2              | Excitation<br>(nm) | Emission<br>(nm) | QY<br>(%) | Ref.      |
|---------------------------|--------------------------|--------------------|------------------|-----------|-----------|
| Adenine                   | 3-aminophenylboric acid  | 305                | 380              | /         | [23]      |
| 3-aminophenylboronic acid | /                        | 490                | 540              | 15.4      | [21]      |
| Phenylboronic acid        | /                        | 247                | 323              | 12        | [16]      |
| Cresyl violet             | Boric acid               | 520                | 616              | 18        | [24]      |
| Citric acid               | Sodium tetraphenylborate | 350                | 443              | 42        | [25]      |
| Ammonium citrate tribasic | 3-aminophenylboric acid  | 430                | 490              | 33.04     | This work |

**Table S2**Comparison of different carbon dots used for the detection of Ag<sup>+</sup>.

| Methods     | Linear range (μM)                                                                        | LOD (nM)                     | QY (%) | Ref.      |
|-------------|------------------------------------------------------------------------------------------|------------------------------|--------|-----------|
| CQD/Au NC   | 1-30                                                                                     | 50                           | /      | [4]       |
| N, S-CDs    | 100-1000                                                                                 | 1.16×10 <sup>4</sup>         | /      | [27]      |
| N-CQDs      | 0-10 and 10-30                                                                           | 1.19×10 <sup>3</sup> and 660 | 5.11   | [11]      |
| Aa N, P-CDs | 0-25                                                                                     | 74.35                        | 7.25   | [28]      |
| CQDs        | 0-0.01 and 0.01-3.0                                                                      | 1.4                          | 9.01   | [10]      |
| TAPI-dots   | 0-1 and 1-8                                                                              | 10.3                         | 74.9   | [3]       |
| N-CDs       | 0-25                                                                                     | 50                           | 19     | [2]       |
| NPCI-CQDs   | 6.6×10 <sup>2</sup> -1.46×10 <sup>3</sup> and 1.50×10 <sup>3</sup> -4.20×10 <sup>3</sup> | 26.38×10 <sup>3</sup>        | 6.65   | [18]      |
| S, N/CDs    | 0.1-25                                                                                   | 37                           | 5.55   | [1]       |
| N, B-CDs    | 0.99-26.04                                                                               | 9.03                         | 33.04  | This work |

**Table S3**Comparison of other methods used for the detection of Ag<sup>+</sup>.

| Methods           | Linear range (μM)     | LOD (nM)             | QY (%) | Ref.      |
|-------------------|-----------------------|----------------------|--------|-----------|
| HNCNs/PDDA/SWCNTs | 10-200                | 1.97                 | /      | [29]      |
| CNNS/PAM/PAA      | 0-100                 | 6.31×10 <sup>3</sup> | /      | [30]      |
| Au@Ag NP-SERS     | 10 <sup>-4</sup> -0.1 | 0.05                 | /      | [31]      |
| B15C5-MWCNTs      | 0.27-10 <sup>5</sup>  | /                    | /      | [32]      |
| N, B-CDs          | 0.99-26.04            | 9.03                 | 33.04  | This work |

**Table S4**Detection of Ag<sup>+</sup> in real water samples. (n=3)

| Sample         | Spiked<br>(μM) | Fluorescent |                |         | UV-vis     |                |         | ICP-MS     |
|----------------|----------------|-------------|----------------|---------|------------|----------------|---------|------------|
|                |                | Found (μM)  | Recoveries (%) | RSD (%) | Found (μM) | Recoveries (%) | RSD (%) | Found (μM) |
| Lingde<br>Lake | 2.0            | 2.02±0.05   | 100.89         | 2.01    | 2.01±0.07  | 100.50         | 1.97    | 2.01       |
|                | 5.0            | 5.37±0.19   | 107.40         | 3.27    | 5.26±0.10  | 105.20         | 2.57    | 5.05       |
|                | 8.0            | 8.07±0.16   | 100.82         | 1.79    | 8.03±0.13  | 100.38         | 1.99    | 7.96       |
|                | 10.0           | 10.50±0.26  | 104.98         | 2.20    | 10.35±0.11 | 103.50         | 2.39    | 10.03      |
